# Supplementary material for: Pharmacophoric Site Identification and Inhibitor Design for Autotaxin
Source: Molecules. 2019 Aug 1;24(15):2808. doi: 10.3390/molecules24152808 (PMC6696049; doi:10.3390/molecules24152808)
Supplement: Supplementary file 1 [file molecules-24-02808-s001.pdf]

## Supplementary Materials

# Pharmacophoric Site Identification and Inhibitor Design for Autotaxin

Myeong Hwi Lee <sup>1</sup>, Dae-Yon Lee <sup>2</sup>, Anand Balupuri <sup>1</sup>, Jong-Woo Jeong <sup>1</sup> and Nam Sook Kang <sup>1,\*</sup>

<sup>1</sup> Graduate School of New Drug Discovery and Development, Chungnam National University, 99 Daehak-ro, Yuseong-gu, Daejeon 34134, Korea

<sup>2</sup> LegoChem Biosciences, Inc., 8-26 Munoyeongseo-ro, Daedeok-gu, Daejeon, 34302, Republic of Korea

\* Correspondence: [nskang@cnu.ac.kr](mailto:nskang@cnu.ac.kr); Tel.: +82-42-821-8626

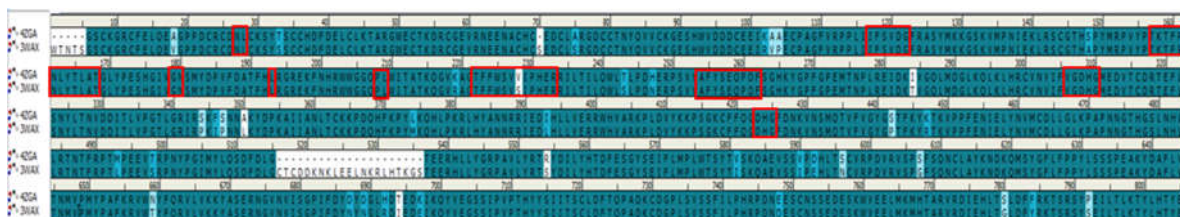

**Figure S1.** Sequence alignment of *Mus musculus* autotaxin (PDB ID 3WAX) and human autotaxin (PDB ID entry code: 4ZGA). They have high similarity with 91.9% and 94.7%, sequence identity and similarity, respectively. Residues near binding site is marked in the red boxes. Most of the marked amino acid residues are identical.

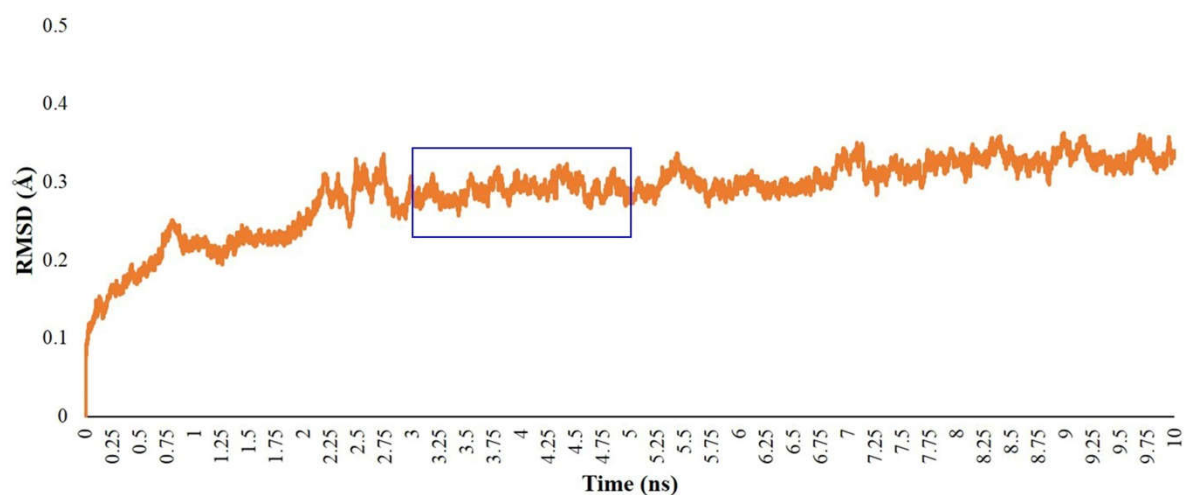

**Figure S2.** RMSD plot for the alpha-carbon atoms of the ATX during 10 ns MD simulation. The 200 trajectories were extracted from the stable region (3-5 ns, marked by blue box) for the TWN analysis.

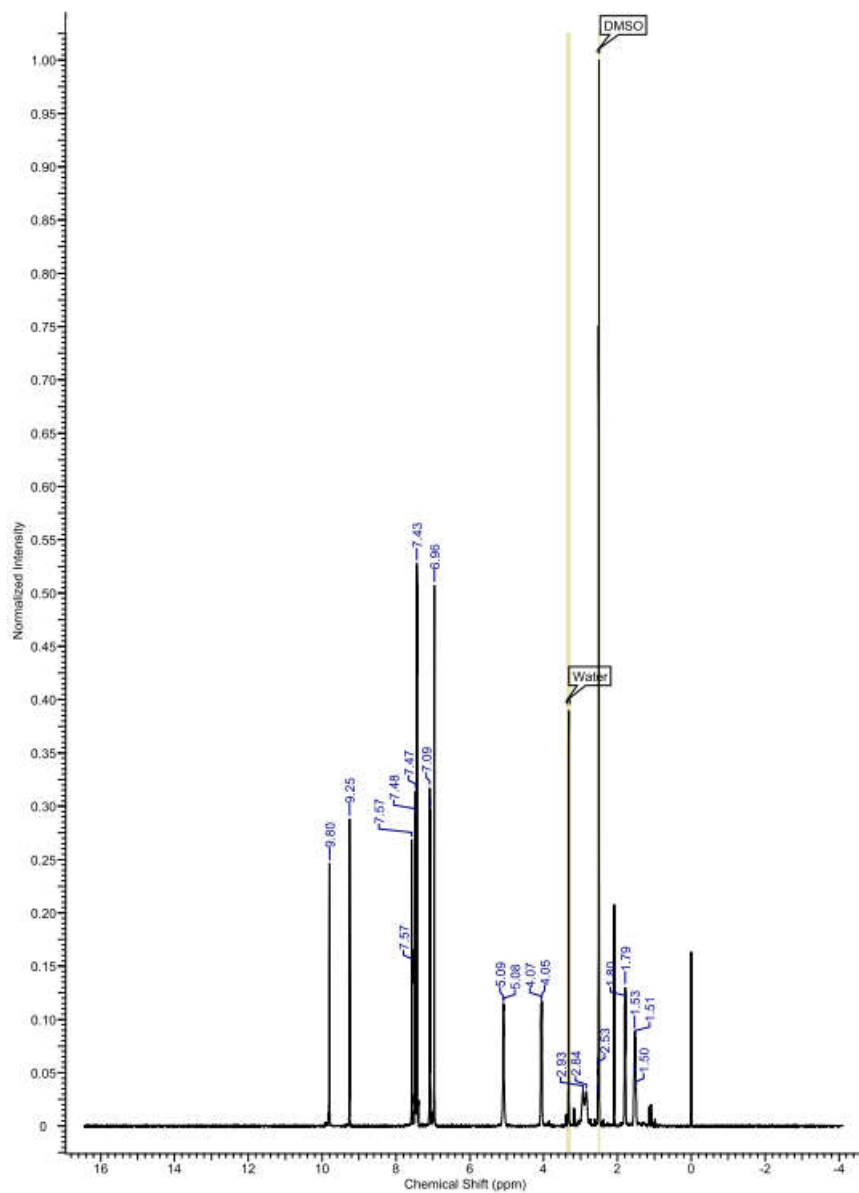

**Figure S3.** <sup>1</sup>H-NMR (600 MHz, DMSO-d<sub>6</sub>) spectra of compound **1**.

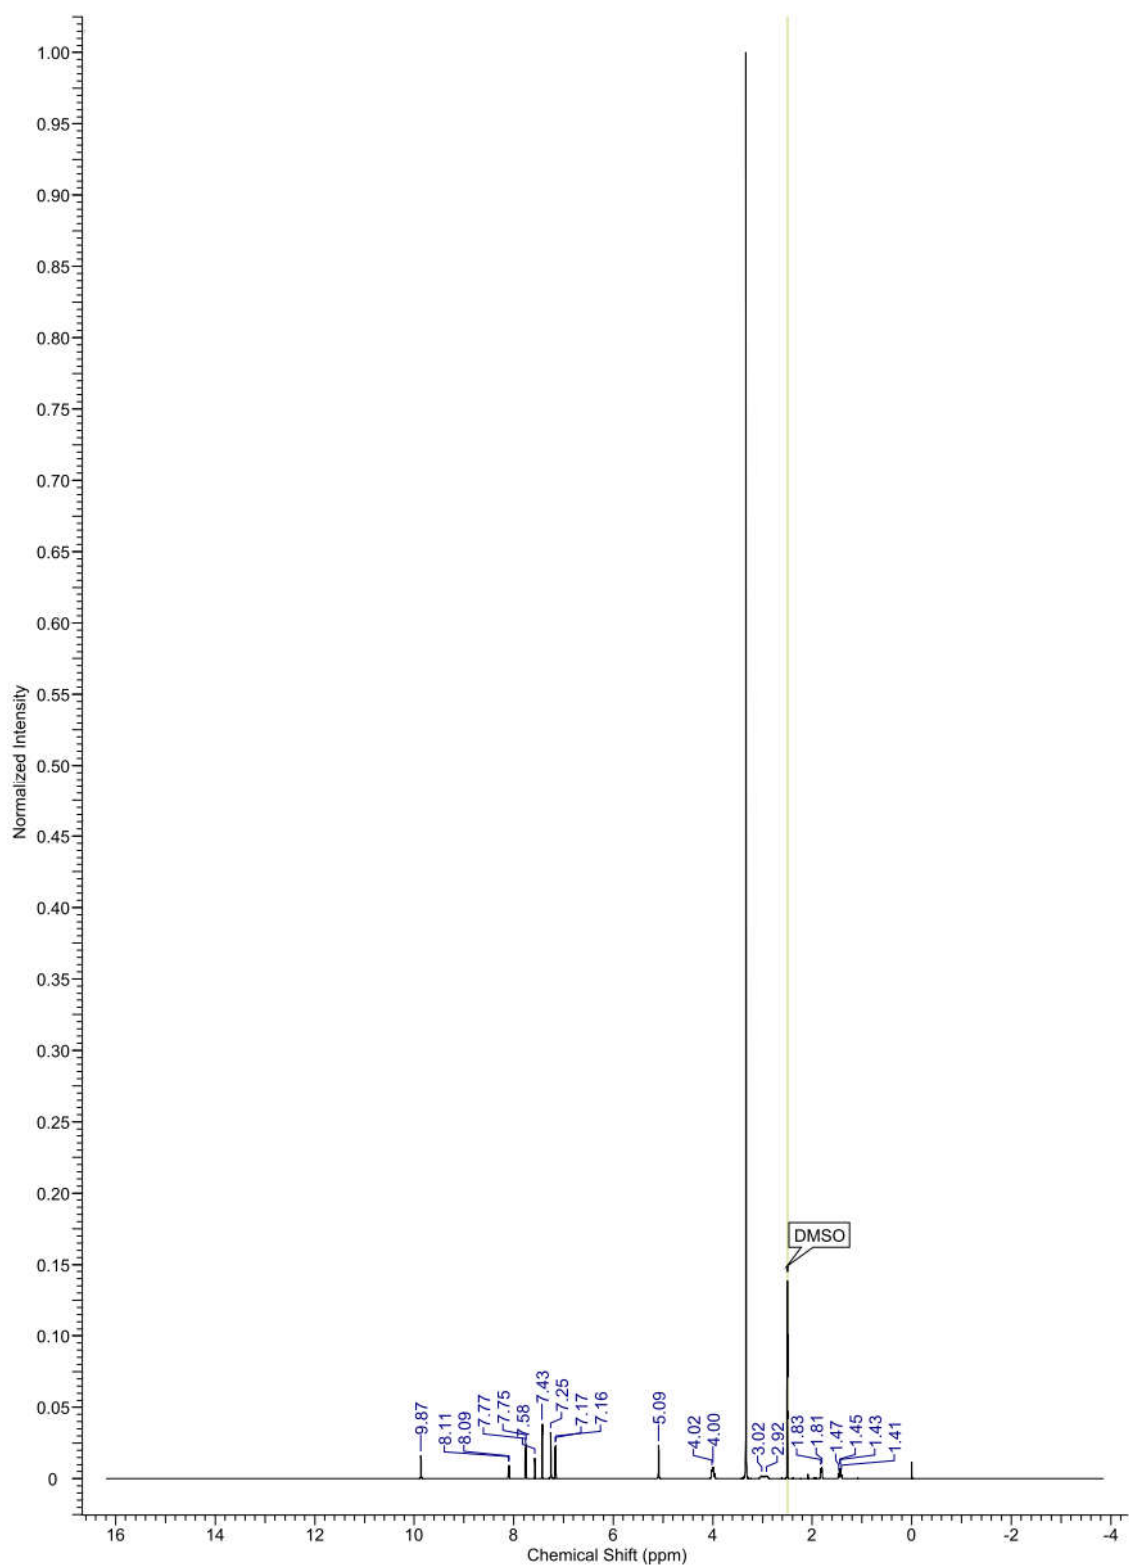

**Figure S4.** <sup>1</sup>H-NMR (600 MHz, DMSO-d<sub>6</sub>) spectra of compound 2.

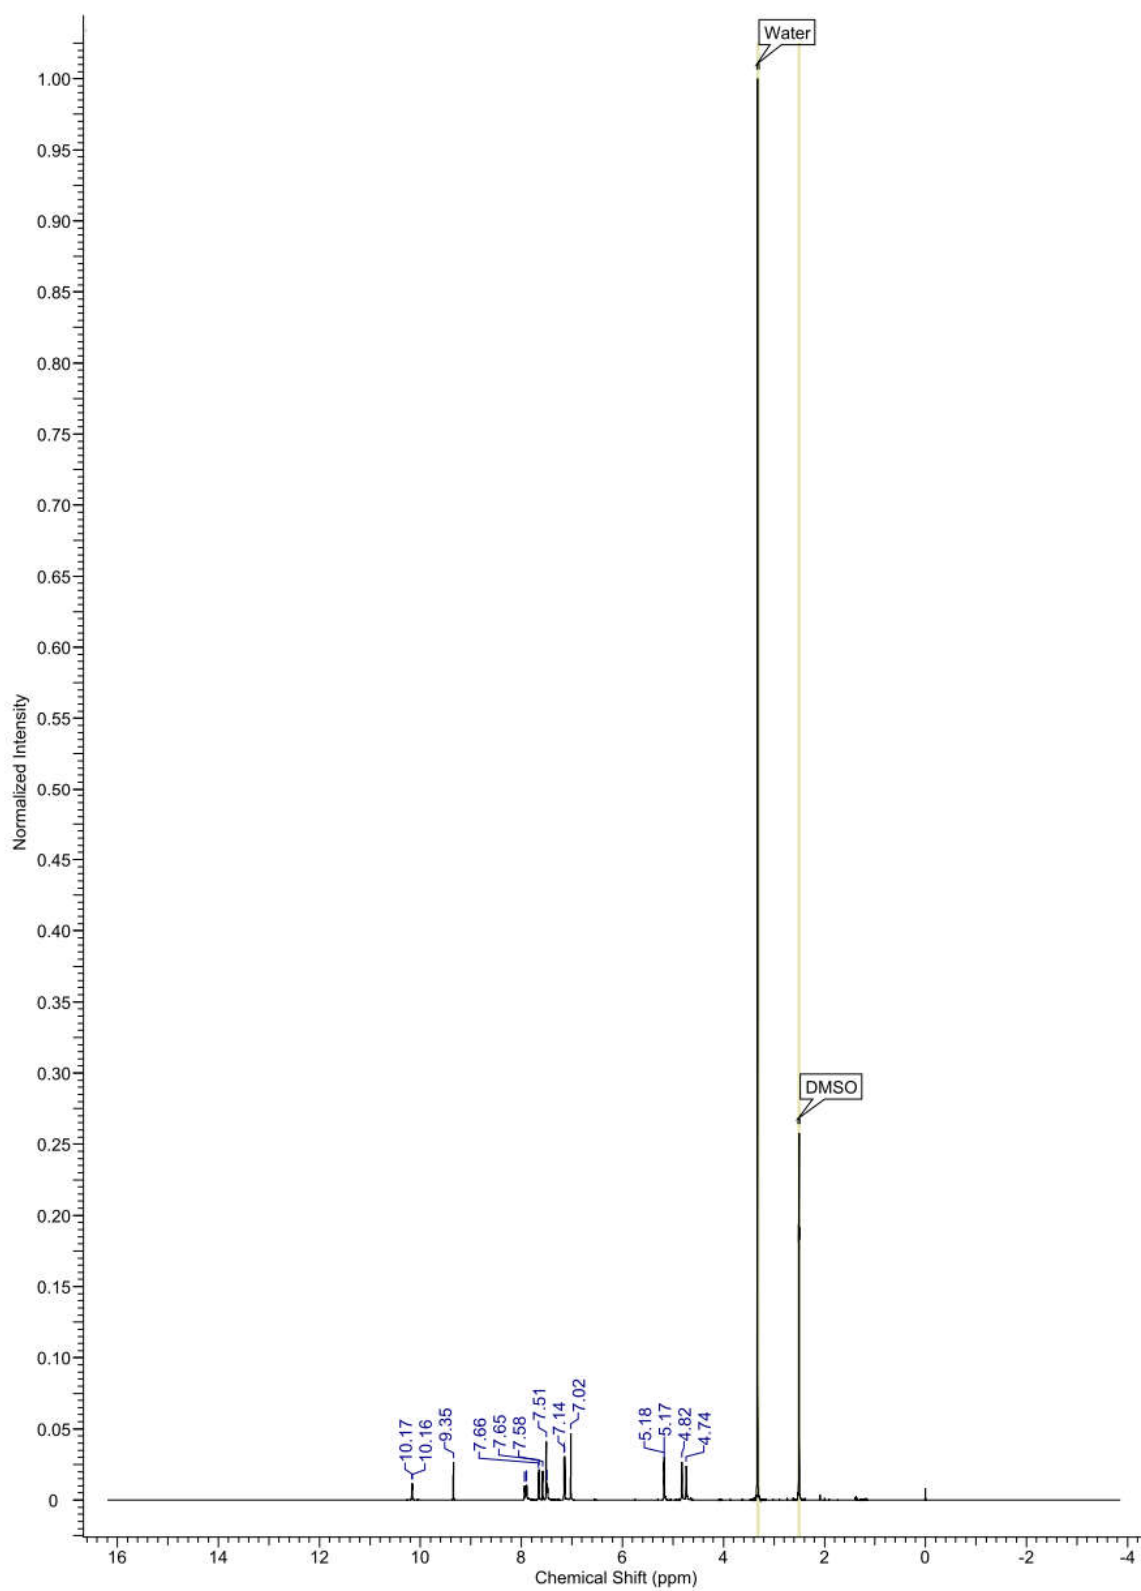

**Figure S5.** <sup>1</sup>H-NMR (600 MHz, DMSO-d<sub>6</sub>) spectra of compound 3.

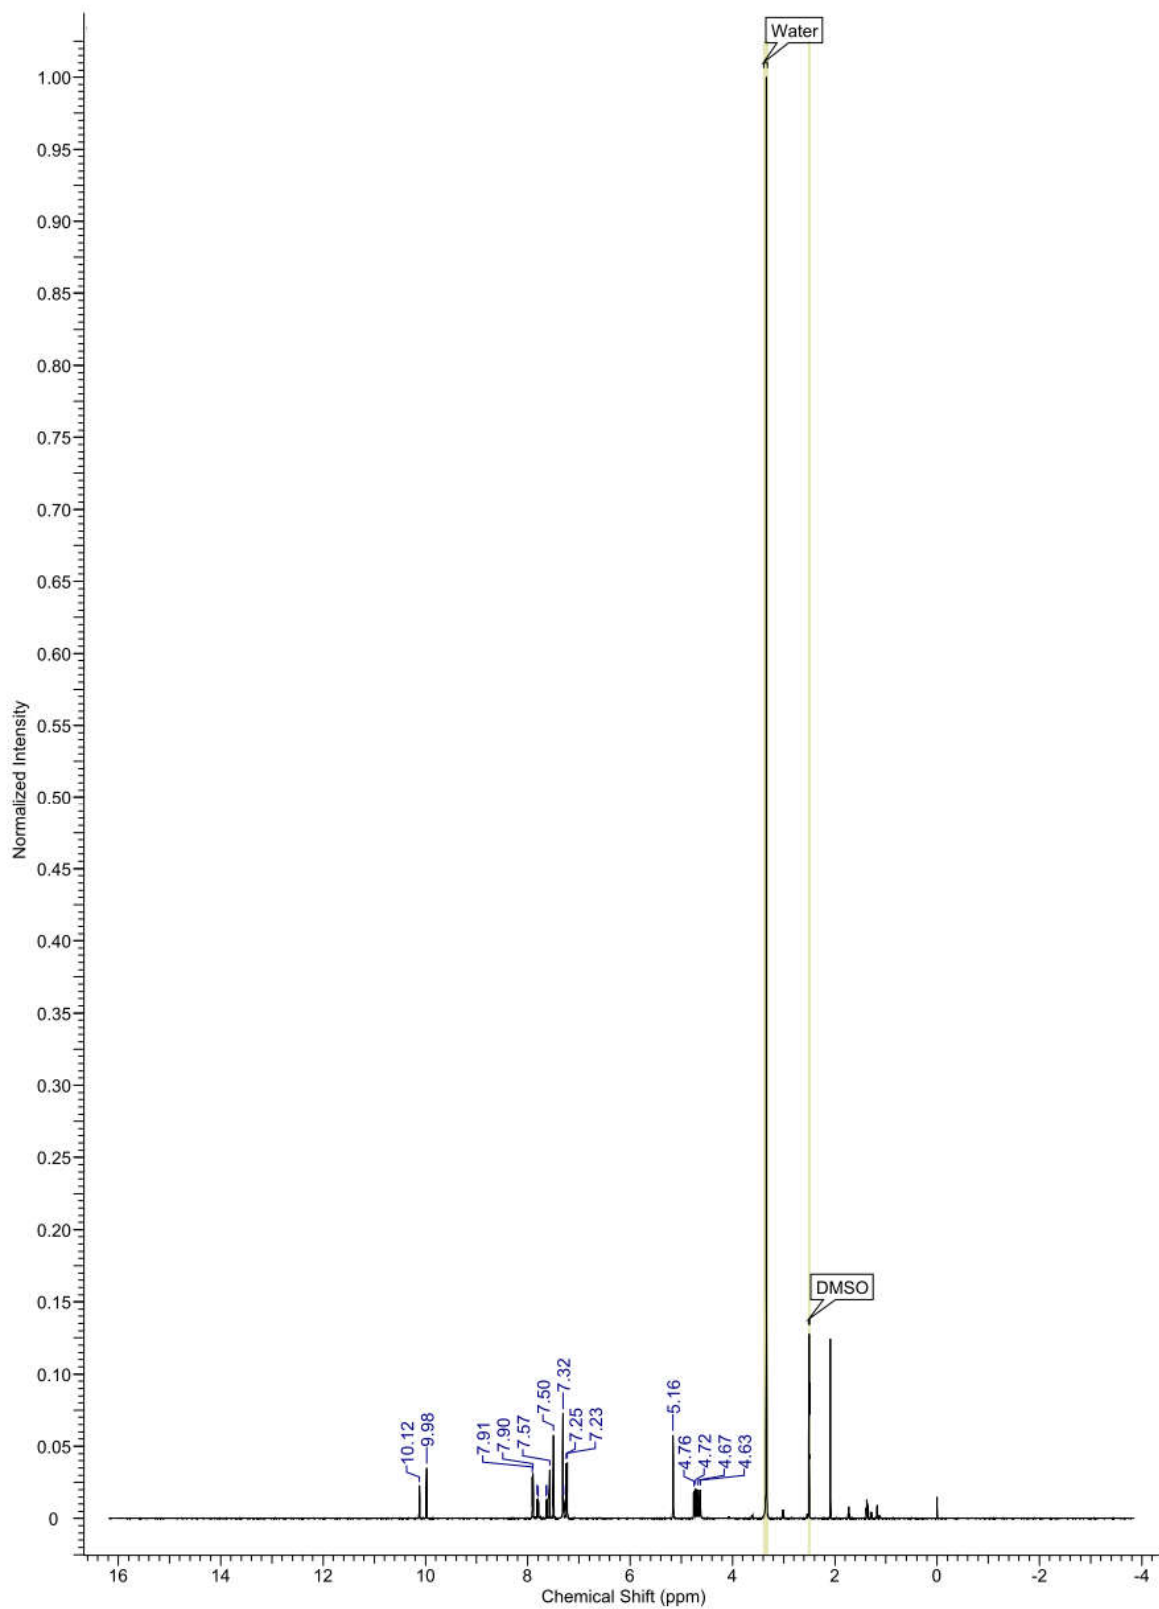

**Figure S6.** <sup>1</sup>H-NMR (600 MHz, DMSO-d<sub>6</sub>) spectra of compound 4.

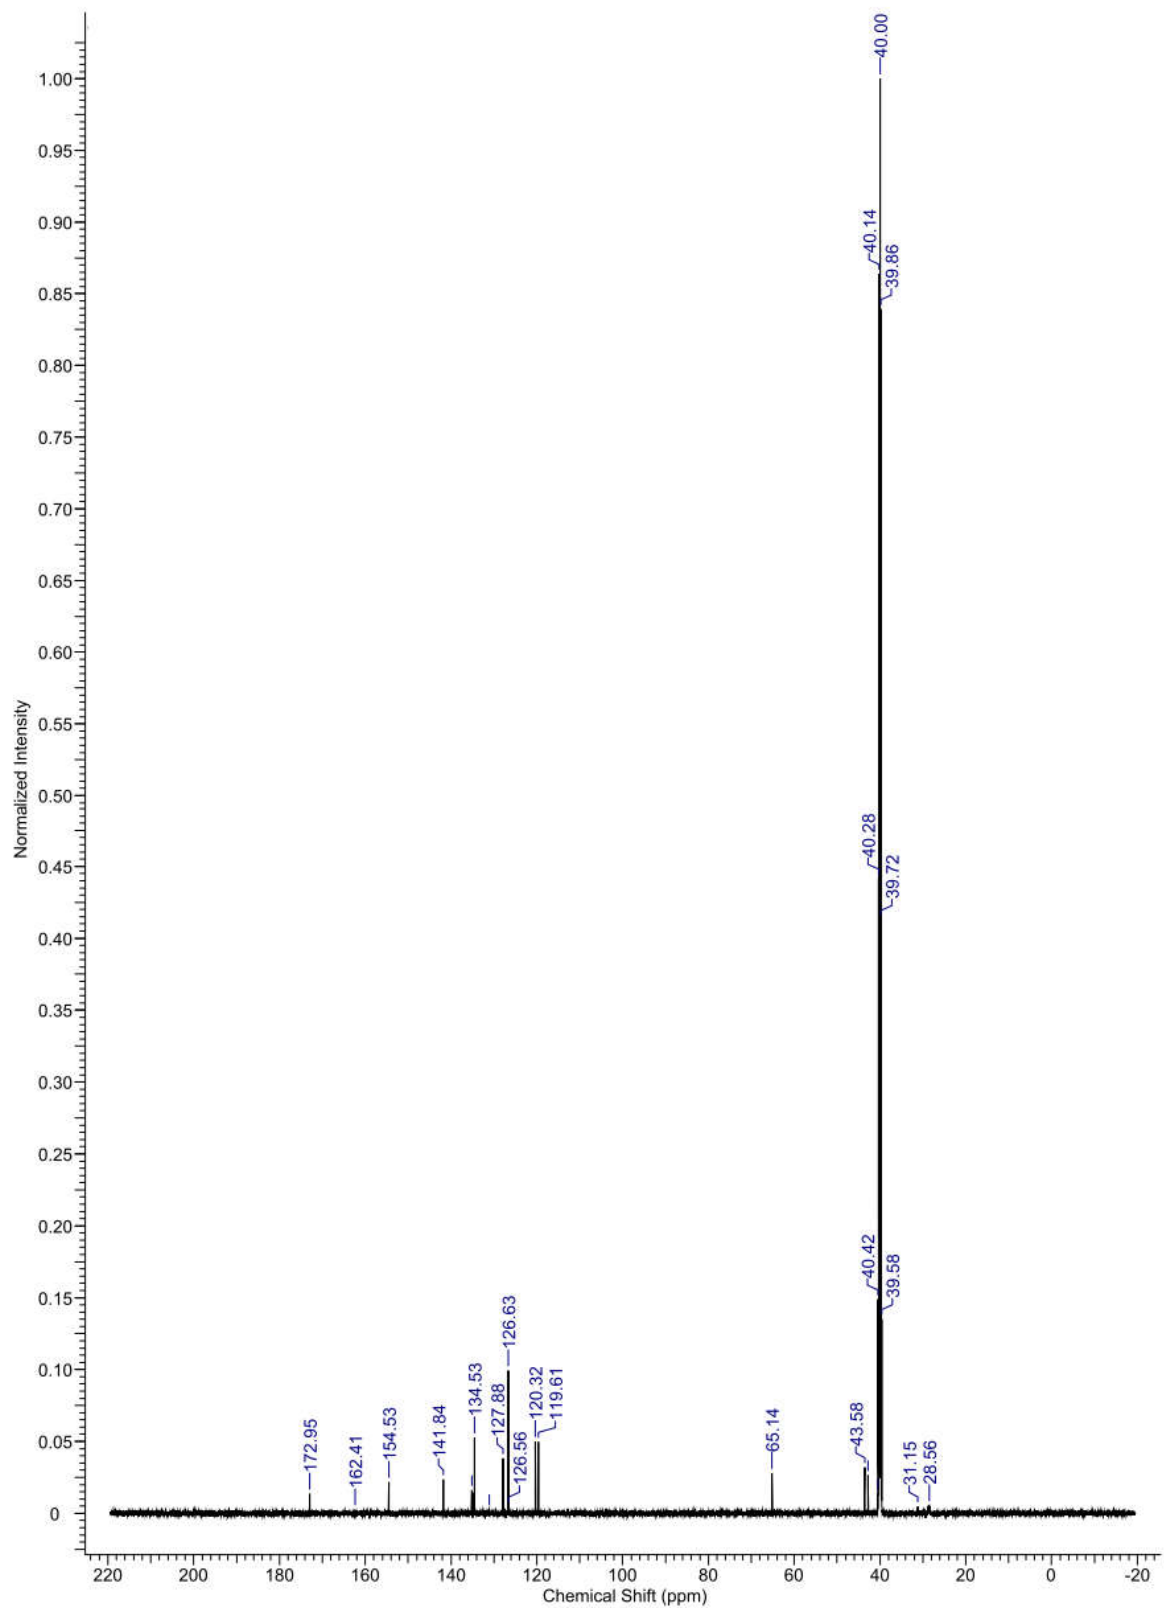

**Figure S7.** <sup>13</sup>C-NMR (150 MHz, DMSO-d<sub>6</sub>) spectra of compound 1.

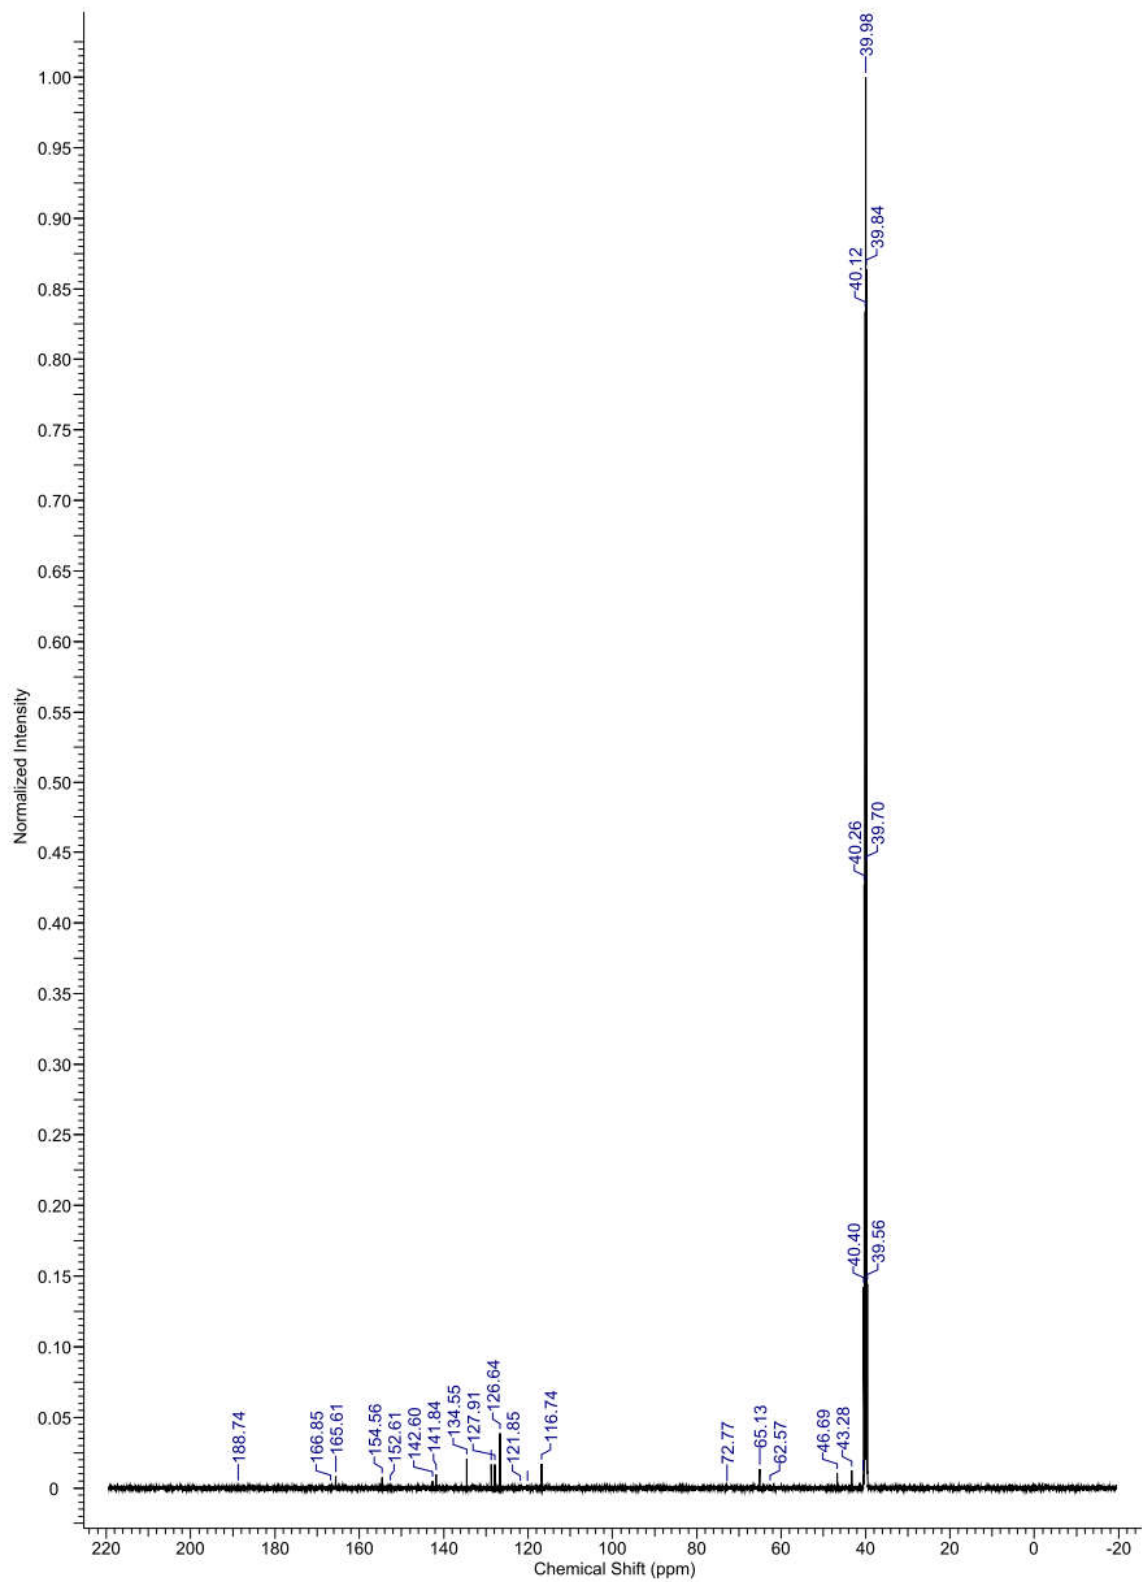

**Figure S8.** <sup>13</sup>C-NMR (150 MHz, DMSO-d<sub>6</sub>) spectra of compound 2.

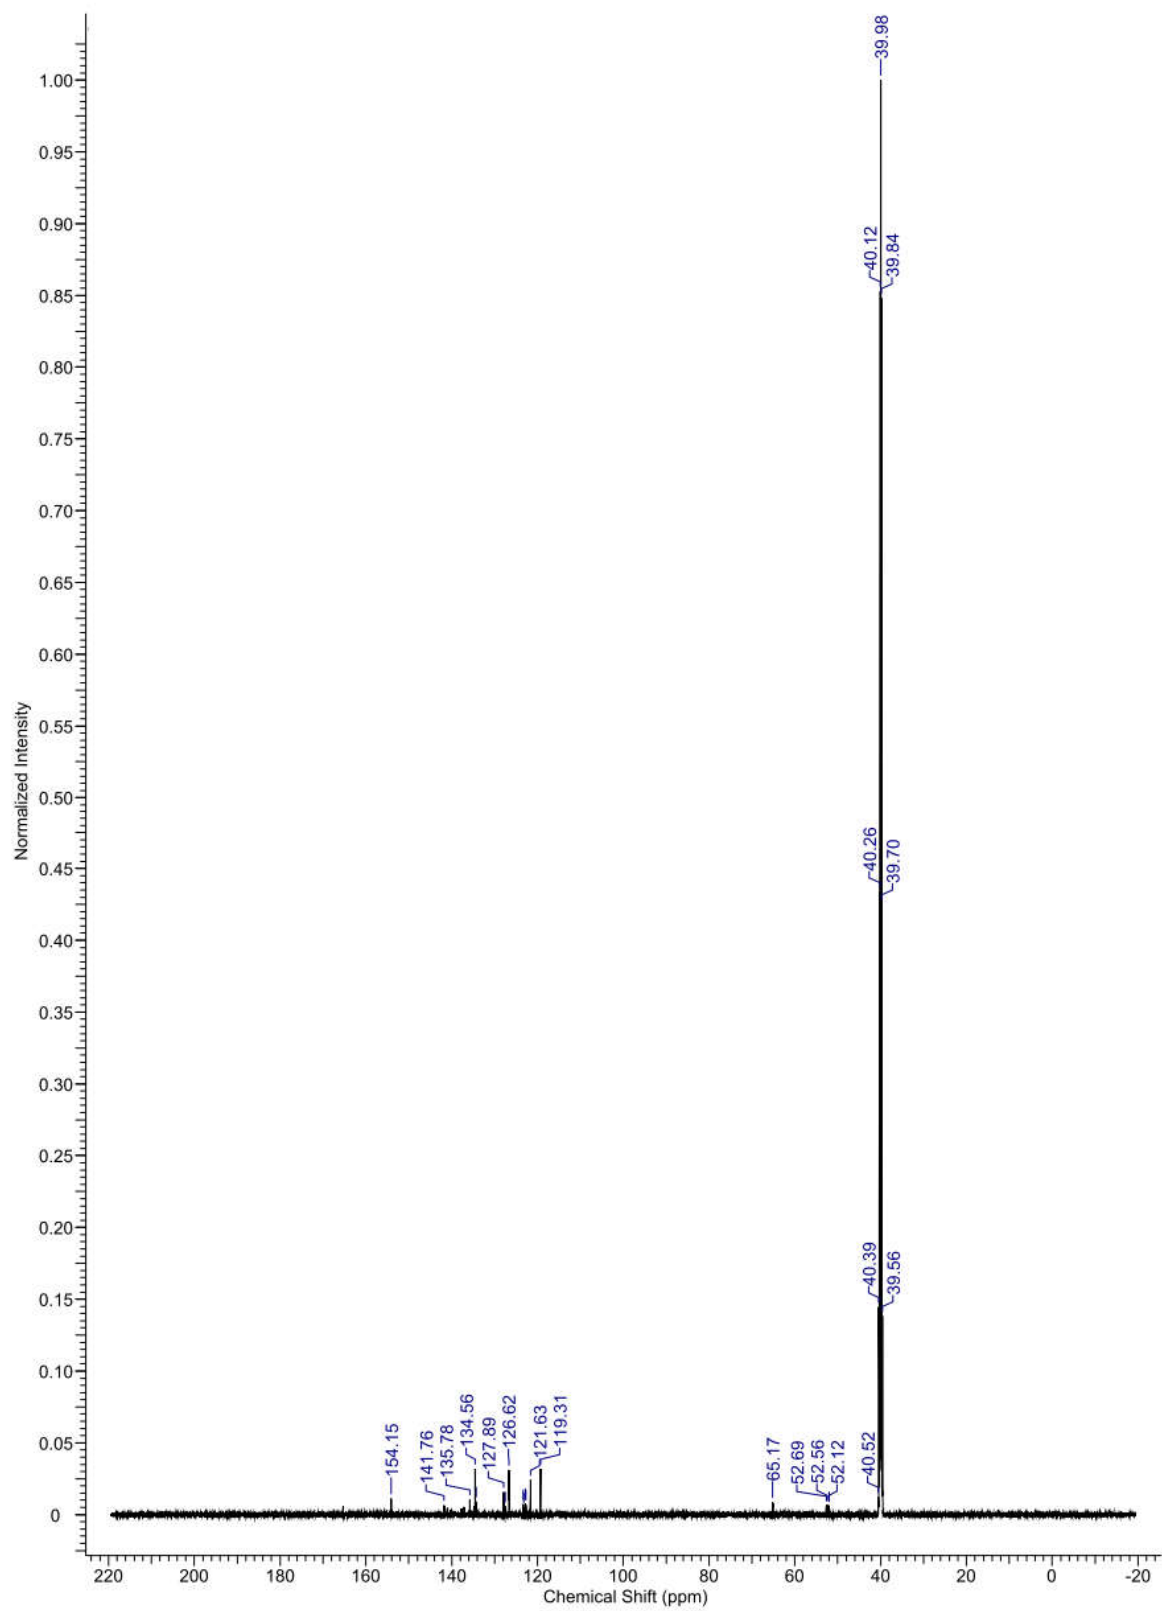

**Figure S9.** <sup>13</sup>C-NMR (150 MHz, DMSO-d<sub>6</sub>) spectra of compound 3.

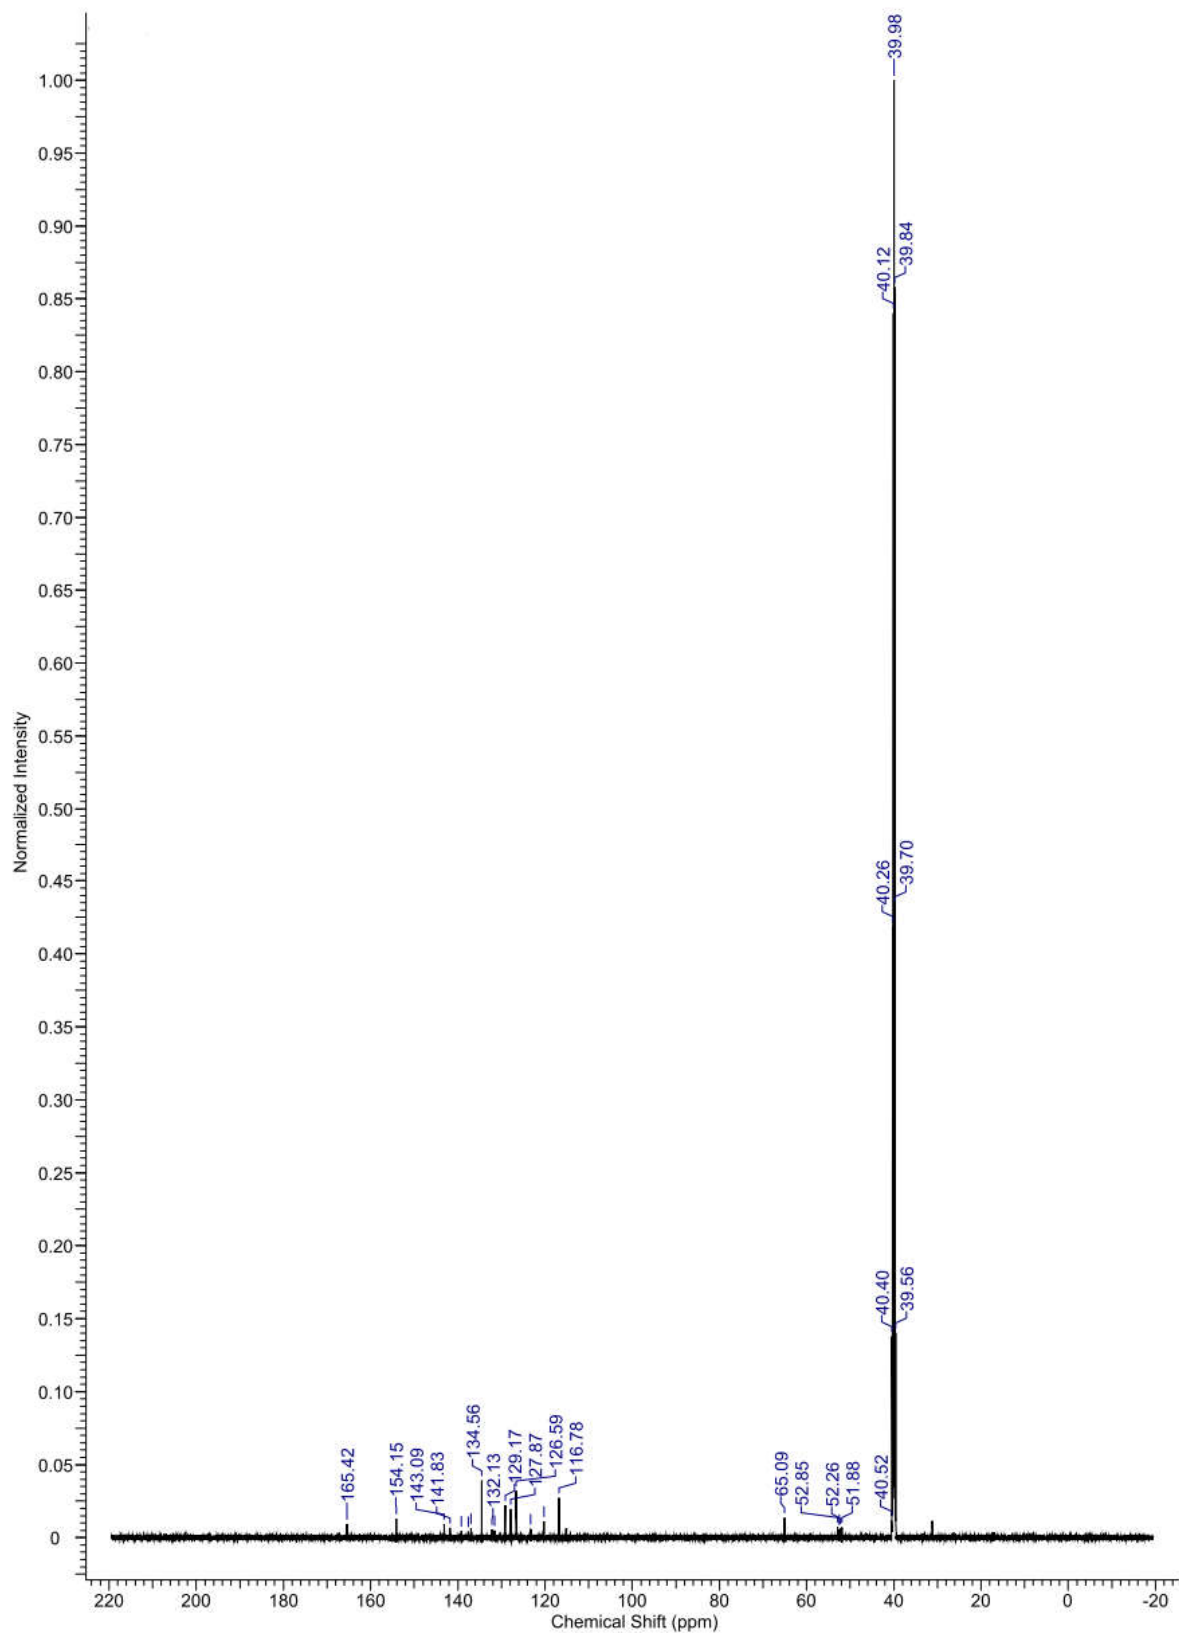

**Figure S10.** <sup>13</sup>C-NMR (150 MHz, DMSO-d<sub>6</sub>) spectra of compound 4.

**Table S1.** HRMS-TOF scan result (Triple TOF 5600 plus system (AB SCIEX)).

| ESI (-)           | Calculated (m/z) | Observed (m/z) | Mass shift (Da) | Mass Accuracy (ppm) |
|-------------------|------------------|----------------|-----------------|---------------------|
| Compound <b>1</b> | 499.0615         | 499.0639       | 0.002           | 4.77                |
| Compound <b>2</b> | 499.0615         | 499.0612       | 0.000           | 0.60                |
| Compound <b>3</b> | 533.0459         | 533.0469       | 0.001           | 1.88                |
| Compound <b>4</b> | 533.0459         | 533.0468       | 0.001           | 1.69                |
| Criteria          |                  |                |                 | < 10                |

**\*Information**

-Scan type: Electrospray ionization (ESI), negative TOF MS mode

-Scan range: 100 to 1,000 Da

-Infusion rate: 3  $\mu$ L/min
